# Supplementary material
Source: publisher figshare collection journal article supplement (https://acs.figshare.com/ndownloader/files/4212136)
Supplement: Supplementary file 1 [file 4212136]

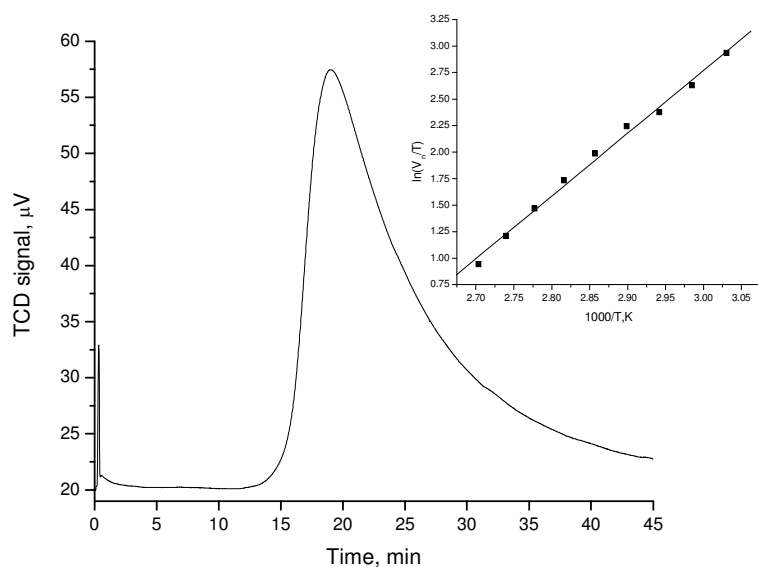

Figure S1. Elution profile of H<sub>2</sub>O injected on silica gel (0.136 g) and the linear regression for determining  $\Delta H_{\text{ads}}$  (inset).

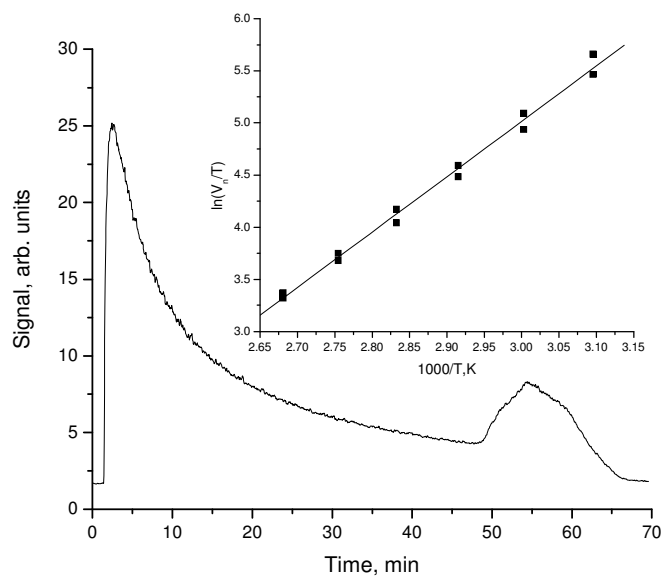

Figure S2. Elution profile of NH<sub>3</sub> injected on silica gel (5.8 mg) at 92 °C and the linear regression for determining  $\Delta H_{\text{ads}}$  (inset). The oven temperature was ramped to 100 °C at 48 min to condition the column prior to the next injection.

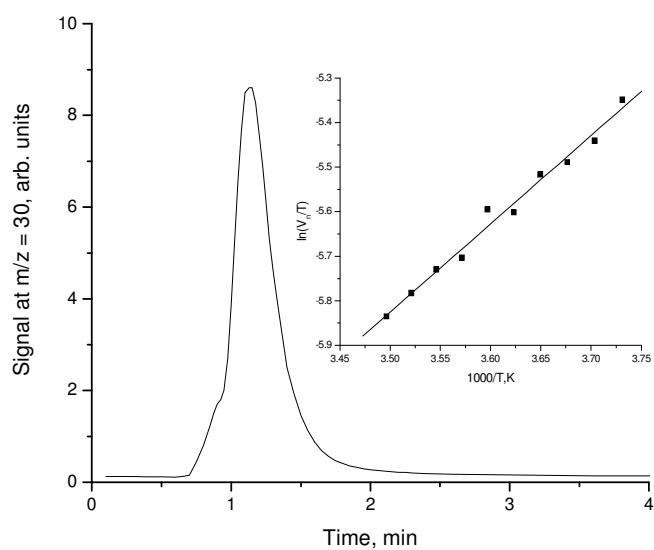

Figure S3. Elution profile of NO injected onto a silica gel column (2.54 g) at  $-30^{\circ}\text{C}$ . The dead time for NO injections ranged from 0.75 to 0.80 min and was determined for each injection by monitoring  $\text{N}_2$  elution ( $m/z = 28$ ). The inset shows the linear regression for the data according to Equation 3.

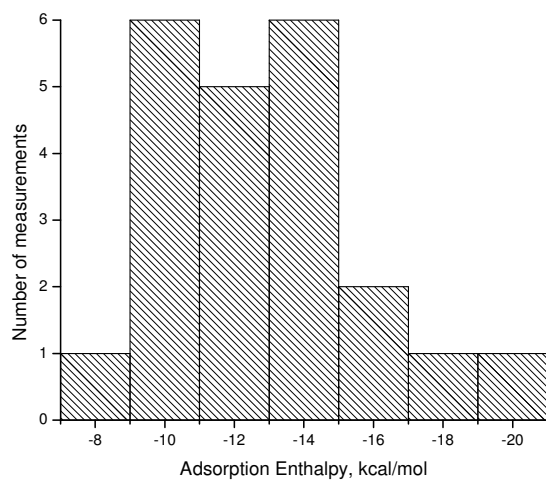

Figure S4. Histogram of enthalpy measurements for  $\text{NH}_3$  on silica gel.
